# Supplementary material
Source: PubMed Central journal article supplement (PMC2946450)
Supplement: NIHMS233584-supplement-1_si_001.pdf [file NIHMS233584-supplement-1_si_001.pdf]

# Construction of Hexagonal Prisms of Variable Size via Coordination-Driven Multicomponent Self-Assembly

Zhigang Zhao, Yao-Rong Zheng, Ming Wang, J. Bryant Pollock, and Peter J. Stang\*

Department of Chemistry, University of Utah, 315 South 1400 East, RM 2020,  
Salt Lake City, Utah 84112

Email: Stang@chem.utah.edu

1. Experimental Section.....S2
2.  $^{31}\text{P}\{^1\text{H}\}$  and  $^1\text{H}$  NMR spectra of self-assembled hexagonal prisms **4c** and **4d**...S4
3. ESI- MS results for hexagonal prisms **4a**, **4b**, and **4d**.....S5
4. Computational model of supramolecular hexagonal prisms **4c** and **4d**.....S5

## Experimental Section

**Methods and Material:** Hexadentate ligand **1**<sup>1,2</sup> and platinum triflate **2**<sup>3</sup> were synthesized according to published literature procedures. The free acids of ligands **3b**, **3c**, and **3d** were purchased from Aldrich and TCI companies. They were then dissolved in an aqueous solution containing 2 equiv. of the sodium hydroxide. Evaporation of the solvent afforded a quantitative recovery of **3b**, **3c** and **3d**. Deuterated solvents were purchased from Cambridge Isotope Laboratory (Andover, MA). NMR spectra were recorded on a Varian Unity 300 spectrometer. The <sup>1</sup>H NMR chemical shifts are reported relative to residual solvent signals, and <sup>31</sup>P NMR resonances are referenced to an external unlock sample of 85% H<sub>3</sub>PO<sub>4</sub> (δ 0.0). Mass spectra for **4a–d** were determined on a Micromass Quattro II triple-quadrupole mass spectrometer using electrospray ionization with a MassLynx operating system.

**General Procedure for the Self-Assembly.** Hexadentate donors **1** (2 equiv), donors **3a–d** (6 equiv) and organoplatinum acceptor **2** (12 equiv) were placed in one glass vial. To the vial containing acceptors and donors was added 1 mL acetone aqueous solution (v/v 9:1). The vial was sealed with Teflon tape, and the resulting suspension was stirred at 50-56 °C for 6 h, after which the clear solution had formed. The OTf<sup>-</sup> counterions were exchanged for PF<sub>6</sub><sup>-</sup> using an aqueous solution of KPF<sub>6</sub> to precipitate the product, which was collected and washed with excess water and then dried in vacuum.

**Supramolecular hexagonal prism 4a.** Yield 93%. MS (ESI) calcd for [M – 4PF<sub>6</sub>]<sup>4+</sup> *m/z* 2751.3, found 2751.2; calcd for [M – 5PF<sub>6</sub>]<sup>5+</sup> *m/z* 2171.5, found 2171.5. <sup>1</sup>H NMR (Acetone-*d*<sub>6</sub>, 300 MHz): δ 9.22 (s, 24H, H<sub>α</sub>-Py for donor **1**), 8.93 (s, 24H, H<sub>α</sub>-Py for donor **3a**), 8.14 (d, *J* = 6.0 Hz, 24H, H<sub>β</sub>-Py for donor **3a**), 7.81 (d, *J* = 6.0 Hz, 24H, H<sub>β</sub>-Py for donor **1**), 7.46 (d, *J* = 9.0 Hz, 24H, ArH), 7.17 (d, *J* = 9.0 Hz, 24H, ArH), 1.92-1.84 (m, 144H, PCH<sub>2</sub>CH<sub>3</sub>), 1.37-1.21 (m, 216H, PCH<sub>2</sub>CH<sub>3</sub>); <sup>31</sup>P {<sup>1</sup>H} NMR (Acetone-*d*<sub>6</sub>, 121.4 MHz): δ 0.85 (dd, <sup>2</sup>*J*<sub>p-p</sub> = 20.68 Hz, <sup>195</sup>Pt satellites, <sup>1</sup>*J*<sub>Pt-P</sub> = 3081 Hz); Anal. Calcd for C<sub>348</sub>H<sub>504</sub>F<sub>144</sub>N<sub>24</sub>P<sub>48</sub>Pt<sub>12</sub>: C, 36.07; H, 4.38; N, 2.90. Found: C, 36.25; H, 4.56; N, 2.90.

**Supramolecular hexagonal prism 4b.** Yield 96%. MS (ESI) calcd for [M – 4PF<sub>6</sub>]<sup>4+</sup>

$m/z$  2328.3, found 2328.3; calcd for  $[M - 5PF_6]^{5+}$   $m/z$  1834.1, found 1834.0.  $^1H$  NMR (Acetone- $d_6$ , 300 MHz):  $\delta$  8.76 (s, 24H,  $H_{\alpha}$ -Py for donor **1**), 7.80 (d,  $J = 6.0$  Hz, 24H,  $H_{\text{phenyl}}$  for donor **3b**), 7.57 (s, 24H,  $H_{\beta}$ -Py for donor **1**), 7.50 (d,  $J = 9.0$  Hz, 24H,  $H_{\text{phenyl}}$  for donor **1**), 7.20 (d,  $J = 6.0$  Hz, 24H,  $H_{\text{phenyl}}$  for donor **1**), 1.92-1.77 (m, 144H,  $PCH_2CH_3$ ), 1.35-1.14(m, 216H,  $PCH_2CH_3$ );  $^{31}P$   $\{^1H\}$  NMR (Acetone- $d_6$ , 121.4 MHz):  $\delta$  6.19 (d,  $^2J_{P-P} = 21.85$  Hz,  $^{195}Pt$  satellites,  $^1J_{Pt-P} = 3228$  Hz), 1.06 (d,  $^2J_{P-P} = 21.85$  Hz,  $^{195}Pt$  satellites,  $^1J_{Pt-P} = 3403$  Hz); Anal. Calcd for  $C_{336}H_{480}F_{72}N_{12}O_{24}P_{36}Pt_{12}$ : C, 40.78; H, 4.89; N, 1.70. Found: C, 40.49; H, 5.02; N, 1.80.

**Supramolecular hexagonal prism 4c.** Yield 94%. MS (ESI) calcd for  $[M - 5PF_6]^{5+}$   $m/z$  1924.7, found 1924.7.  $^1H$  NMR (Acetone- $d_6$ , 300 MHz):  $\delta$  8.96 (s, 24H,  $H_{\alpha}$ -Py for donor **1**), 8.03 (d,  $J = 9.0$  Hz, 24H,  $H_{\text{phenyl}}$  for donor **3c**), 7.71 (s, 48H,  $H_{\beta}$ -Py for donor **1** and  $H_{\text{phenyl}}$  for donor **3c**), 7.49 (d,  $J = 6.0$  Hz, 12H,  $H_{\text{phenyl}}$  for donor **1**), 7.30 (d,  $J = 9.0$  Hz, 12H,  $H_{\text{phenyl}}$  for donor **1**), 7.10 (d,  $J = 6.0$  Hz, 12H,  $H_{\text{phenyl}}$  for donor **1**), 6.88 (d,  $J = 9.0$  Hz, 12H,  $H_{\text{phenyl}}$  for donor **1**), 1.92-1.81 (m, 144H,  $PCH_2CH_3$ ), 1.39-1.18 (m, 216H,  $PCH_2CH_3$ );  $^{31}P$   $\{^1H\}$  NMR (Acetone- $d_6$ , 121.4 MHz):  $\delta$  6.73 (d,  $^2J_{P-P} = 21.85$  Hz,  $^{195}Pt$  satellites,  $^1J_{Pt-P} = 3201$  Hz), 1.10 (d,  $^2J_{P-P} = 21.85$  Hz,  $^{195}Pt$  satellites,  $^1J_{Pt-P} = 3437$  Hz); Anal. Calcd for  $C_{372}H_{504}F_{72}N_{12}O_{24}P_{36}Pt_{12}$ : C, 43.16; H, 4.91; N, 1.62. Found: C, 42.95; H, 5.04; N, 1.67.

**Supramolecular hexagonal prism 4d.** Yield 91%. MS (ESI) calcd for  $[M - 5PF_6]^{5+}$   $m/z$  1958.4, found 1958.4; calcd for  $[M - 6PF_6]^{6+}$   $m/z$  1607.9, found 1607.8.  $^1H$  NMR (Acetone- $d_6$ , 300 MHz):  $\delta$  8.95 (s, 24H,  $H_{\alpha}$ -Py for donor **1**), 7.99-7.81 (m, 72H,  $H_{\beta}$ -Py for donor **1** and  $H_{\text{phenyl}}$  for donor **3d**), 7.63 (d,  $J = 9.0$  Hz, 12H,  $H_{\text{phenyl}}$  for donor **1**), 7.36-7.28(m, 24H,  $H_{\text{phenyl}}$  for donor **1**), 7.01 (d,  $J = 9.0$  Hz, 12H,  $H_{\text{phenyl}}$  for donor **1**), 1.89-1.76 (m, 144H,  $PCH_2CH_3$ ), 1.33-1.21 (m, 216H,  $PCH_2CH_3$ );  $^{31}P$   $\{^1H\}$  NMR (Acetone- $d_6$ , 121.4 MHz):  $\delta$  7.16 (d,  $^2J_{P-P} = 21.85$  Hz,  $^{195}Pt$  satellites,  $^1J_{Pt-P} = 3170$  Hz), 2.13 (d,  $^2J_{P-P} = 21.85$  Hz,  $^{195}Pt$  satellites,  $^1J_{Pt-P} = 3388$  Hz); Anal. Calcd for  $C_{372}H_{504}F_{72}N_{24}O_{24}P_{36}Pt_{12}$ : C, 42.47; H, 4.83; N, 3.20. Found: C, 42.14; H, 4.81; N, 3.13.

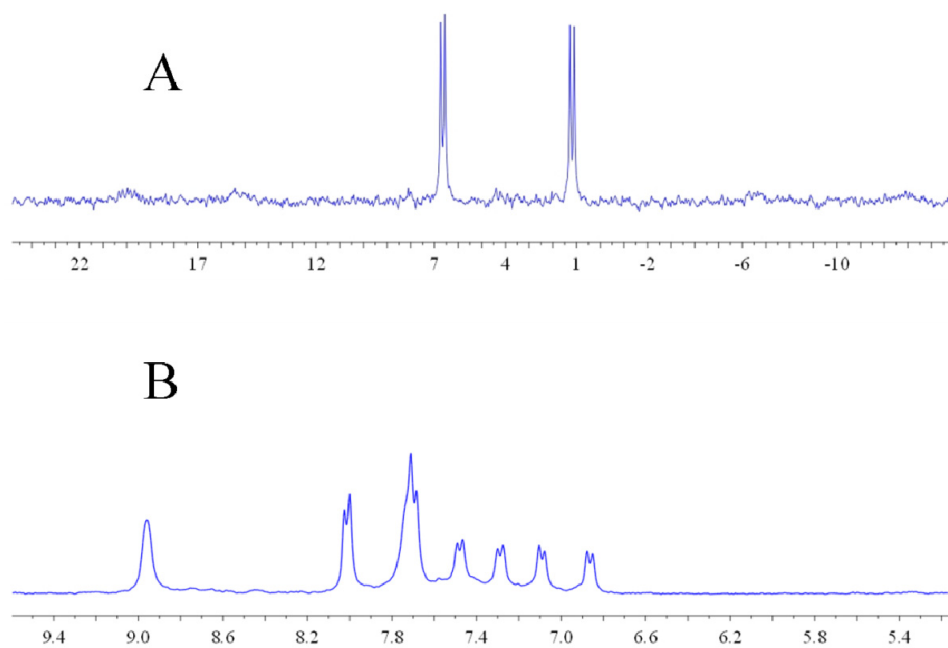

Figure S1.  $^{31}\text{P}\{^1\text{H}\}$  (A) and partial  $^1\text{H}$  NMR (B) spectra of self-assembled hexagonal prism **4c**.

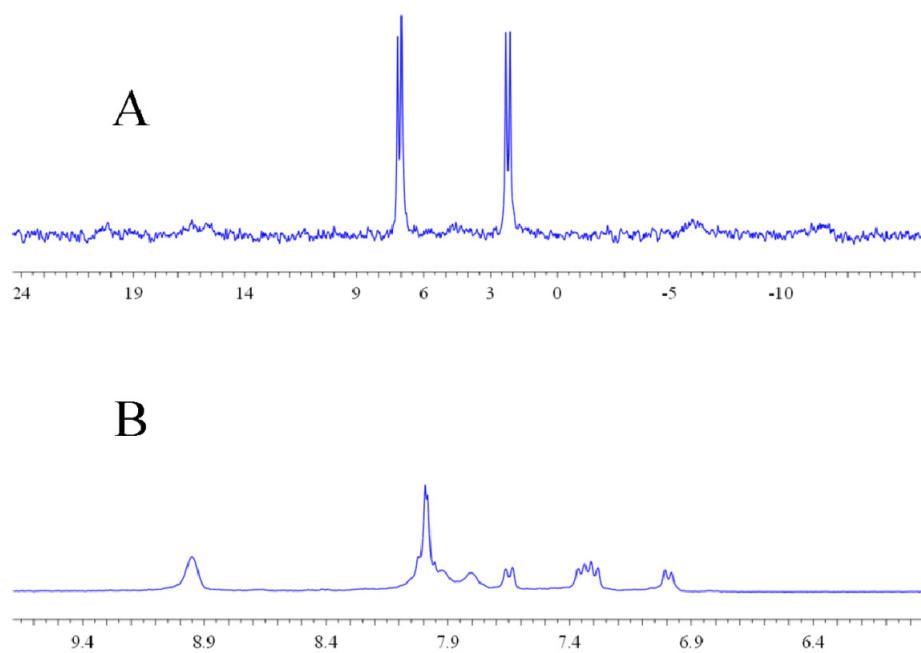

Figure S2.  $^{31}\text{P}\{^1\text{H}\}$  (A) and partial  $^1\text{H}$  NMR (B) spectra of self-assembled hexagonal prism **4d**.

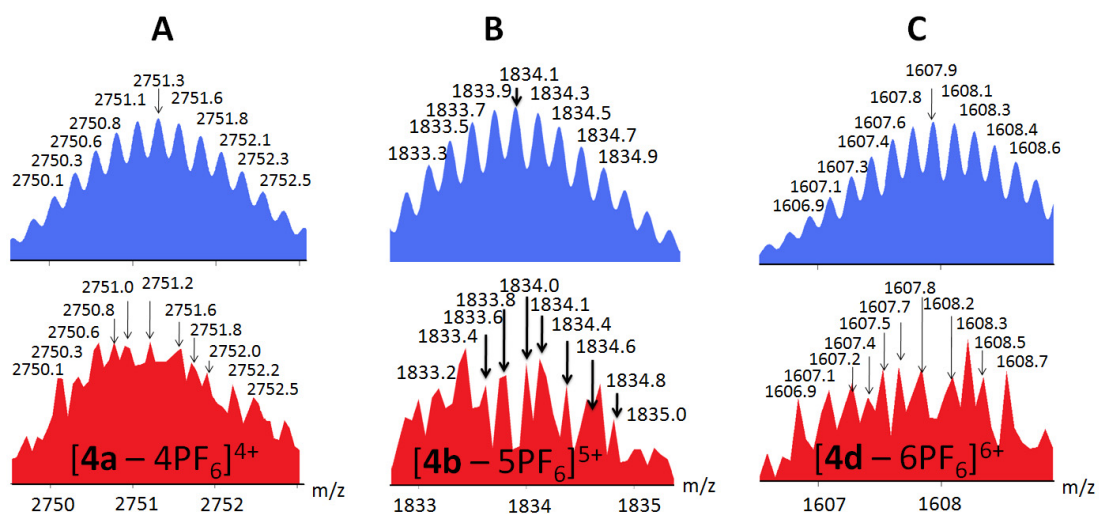

Figure S3. Theoretical (top, blue) and experimental (bottom, red) ESI-MS results for hexagonal prisms **4a** (A), **4b**(B), and **4d** (C).

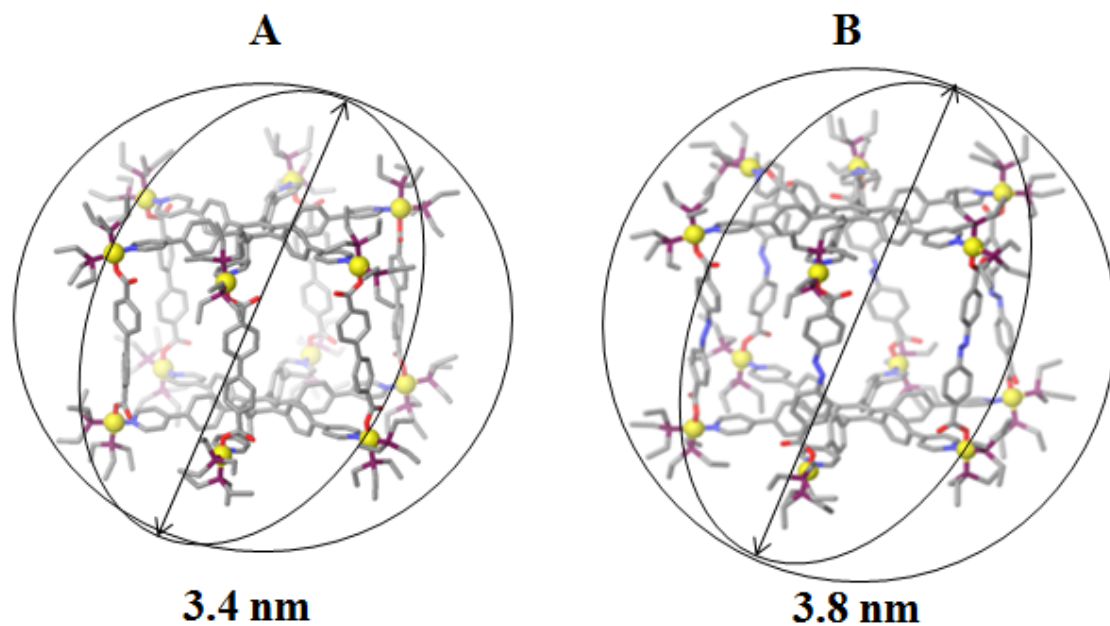

Figure S4. Molecular modeling of supramolecular hexagonal prisms **4c** (A) and **4d** (B).

## References

- (1) Rathore, R.; Burns, C. L.; Guzei, I. A. *J. Org. Chem.* **2004**, *69*, 1524–1530.
- (2) Hoffmann, M.; Kärnbratt, J.; Chuan, M. H.; Herz, L. M.; Albinsson, B.; Anderson, H. L. *Angew. Chem., Int. Ed.* **2008**, *47*, 4993–4996.
- (3) Stang, P. J.; Cao, D. H.; Saito, S.; Arif, A. M. *J. Am. Chem. Soc.* **1995**, *117*, 6273–6283.
